# Supplementary material
Source: HighWire-hosted journal article supplement (https://www.ajevonline.org/content/suppl/2020/12/19/ajev.2020.20038)
Supplement: Supplemental_Data.pdf [file Supplemental_Data.pdf]

**Supplemental Data for:**

Arancibia C, Malovini E, Agüero CB, Buscema F, Alonso R, Walker MA and Martínez LE. 2021.

Evaluation of two phylloxera genotypes in Argentina on six *Vitis vinifera* cultivars and three rootstocks.

Am J Enol Vitic 72:94-100. doi: 10.5344/ajev.2020.20038.

**Supplemental Table 1** Probability values ( $p$  value), degrees of freedom (df), and F-values of the generalized linear models and generalized linear mixed models in non-significant treatments ( $p > 0.05$ ) and significant treatments non-reported because of a significant interaction  $p$  value.

| Variable                          | Treatment                                            | $p$ value                      | df     | F-value |
|-----------------------------------|------------------------------------------------------|--------------------------------|--------|---------|
| Hatching                          | Cultivar                                             | <0.0001                        | 5      | 7.45    |
|                                   | Phylloxera Genotype                                  | 0.6664                         | 1      | 0.19    |
| Survivorship                      | Cultivar                                             | 0.0002                         | 5      | 4.95    |
|                                   | Phylloxera Genotype                                  | 0.1513                         | 1      | 2.07    |
|                                   | Time                                                 | <0.0001                        | 3      | 156.45  |
|                                   | Cultivar × Phylloxera Genotype                       | 0.7276                         | 5      | 0.56    |
|                                   | Phylloxera Genotype × Time                           | 0.5627                         | 3      | 0.68    |
|                                   | Cultivar × Phylloxera Genotype × Time                | 0.0602                         | 15     | 1.64    |
|                                   | Developmental time                                   | Cultivar × Phylloxera Genotype | 0.4108 | 5       |
| Maximum number of adults          | Phylloxera Genotype                                  | 0.9733                         | 1      | 0.0011  |
|                                   | Phylloxera Genotype × Time                           | 0.8806                         | 5      | 0.35    |
| Fecundity                         | Cultivar                                             | <0.0001                        | 5      | 21.06   |
|                                   | Phylloxera Genotype                                  | 0.1961                         | 1      | 1.68    |
|                                   | Time                                                 | <0.0001                        | 3      | 31.16   |
|                                   | Cultivar × Phylloxera Genotype                       | 0.0619                         | 5      | 2.12    |
|                                   | Cultivar × Time                                      | <0.0001                        | 15     | 3.6     |
|                                   | Phylloxera Genotype × Time                           | 0.004                          | 3      | 4.5     |
| Gross reproductive rate           | Phylloxera Genotype                                  | 0.8795                         | 1      | 0.02    |
|                                   | Cultivar × Phylloxera Genotype                       | 0.3214                         | 5      | 1.18    |
| Net reproductive rate             | Phylloxera Genotype                                  | 0.9018                         | 1      | 0.02    |
|                                   | Cultivar × Phylloxera Genotype                       | 0.9835                         | 5      | 0.14    |
| Population increase <sub>5</sub>  | Cultivar × Phylloxera Genotype                       | 0.0776                         | 5      | 2.04    |
| Population increase <sub>9</sub>  | Phylloxera Genotype                                  | 0.1037                         | 1      | 2.69    |
| Population increase <sub>9</sub>  | Cultivar × Phylloxera Genotype                       | 0.1039                         | 5      | 1.87    |
| Population increase <sub>15</sub> | Phylloxera Genotype                                  | 0.6849                         | 1      | 12.21   |
| Population increase <sub>15</sub> | Cultivar × Phylloxera Genotype                       | 0.9036                         | 5      | 0.31    |
| Population increase <sub>20</sub> | Phylloxera Genotype                                  | 0.8804                         | 1      | 0.02    |
| Population increase <sub>20</sub> | Cultivar × Phylloxera Genotype                       | 0.9765                         | 5      | 0.16    |
| Survivorship (rootstock)          | Rootstock                                            | <0.0001                        | 3      | 90      |
|                                   | Phylloxera Genotype                                  | 0.6595                         | 1      | 0.19    |
|                                   | Hormonal treatment                                   | <0.0001                        | 1      | 23.19   |
|                                   | Rootstock × Phylloxera Genotype                      | 0.4944                         | 3      | 0.8     |
|                                   | Phylloxera Genotype × Hormonal treatment             | 0.9737                         | 1      | 0.001   |
|                                   | Rootstock × Phylloxera Genotype × Hormonal treatment | 0.4952                         | 3      | 0.8     |
